# Supplementary material for: Splice site identification using probabilistic parameters and SVM classification
Source: PubMed Central journal article supplement (PMC1764471; doi:10.1186/1471-2105-7-s5-s15), 2006-12-18
Supplement: 1471-2105-7-S5-S15-S1.pdf [file 1471-2105-7-S5-S15-S1.pdf]

**Figure 1:** Comparison of performance between different SVM kernels for the identification of NN269 acceptor splice site. MM1 remains as the core pre-processing method while SVM with polynomial, linear and RBF kernel are used. All the kernels perform almost equally well.

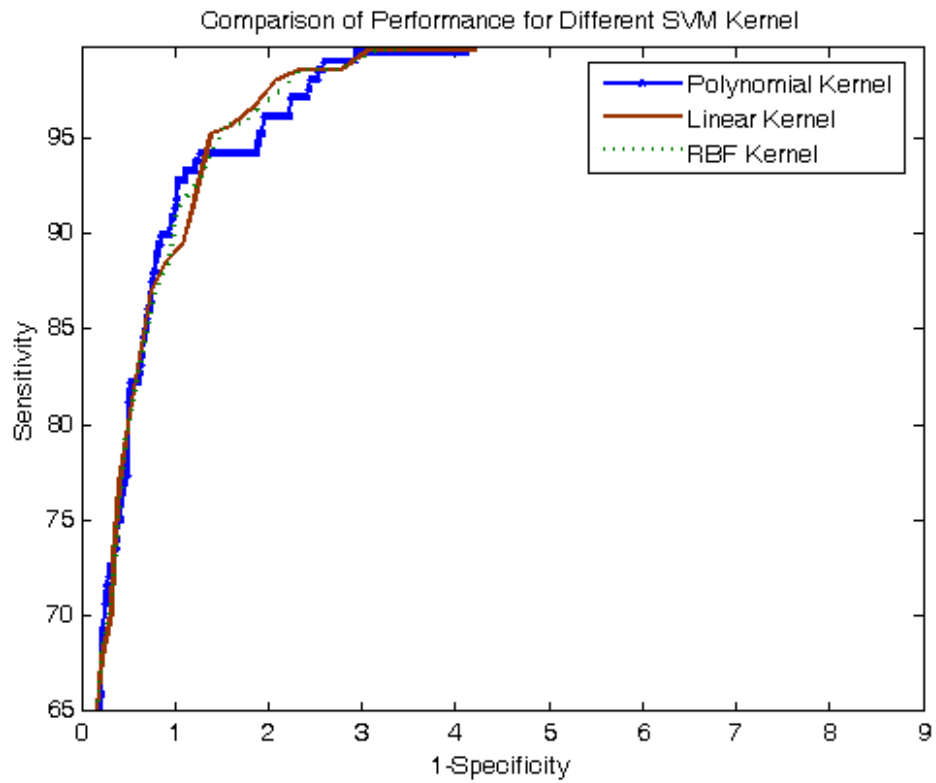

**Figure 2:** Comparison of performance between different SVM kernels for the identification of NN269 donor splice site. MM1 remains as the core pre-processing method while SVM with polynomial, linear and RBF kernel are used. All the kernels perform almost equally well.

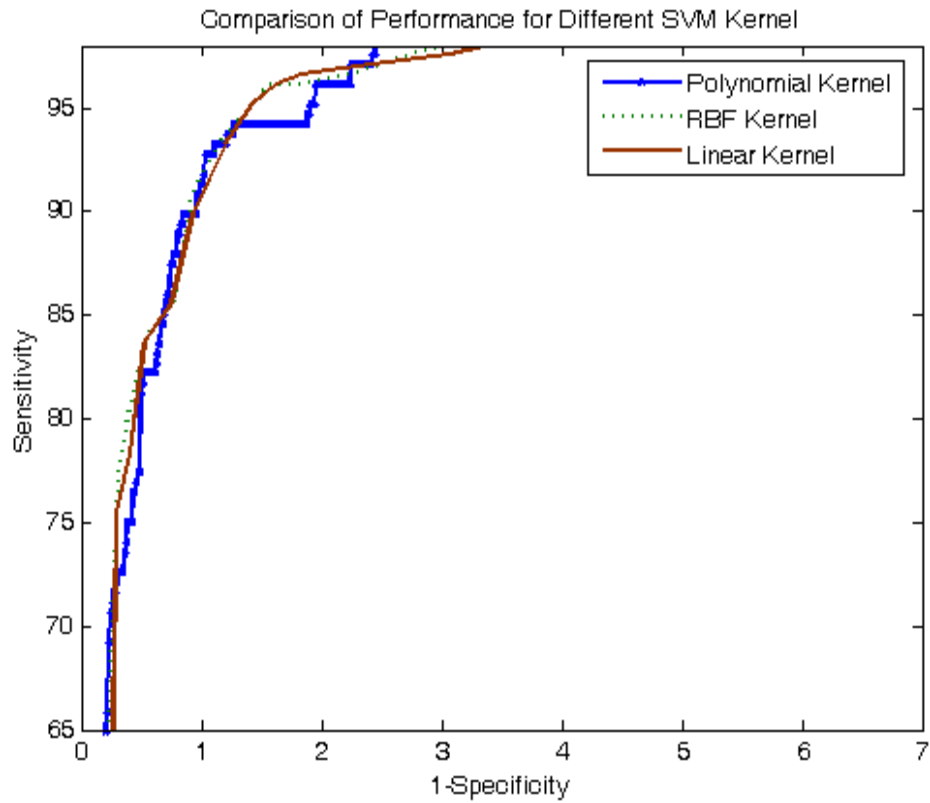

**Table 1:** NN269 Acceptor: the sensitivity and specificity values of MM1-SVM method and other methods. Sensitivity (TP/TP+FN), is the percentage of correct prediction of true sites and Specificity (TN/TN+FP) is the percentage of correct prediction of false sites.

|           | <b>MM1-SVM</b> | <b>Loi-Rajapakse</b> | <b>GeneSplicer</b> | <b>NNSplice</b> |
|-----------|----------------|----------------------|--------------------|-----------------|
| <b>SN</b> | <b>1-SP</b>    | <b>1-SP</b>          | <b>1-SP</b>        | <b>1-SP</b>     |
| 65        | 0.21           | 0.9                  | 0.7                | 1.1             |
| 70        | 0.28           | 1.1                  | 0.9                | 1.3             |
| 75        | 0.41           | 1.2                  | 1.7                | 1.6             |
| 80        | 0.55           | 1.5                  | 2.6                | 2.3             |
| 85        | 0.75           | 2.8                  | 3.4                | 3.6             |
| 90        | 1.1            | 4                    | 5.5                | 4.8             |
| 95        | 2.0            | 5.9                  | 7.9                | 10.4            |

**Table 2:** NN269 Donor: the sensitivity and specificity values of MM1-SVM method and other methods. Sensitivity (TP/TP+FN), is the percentage of correct prediction of true sites and Specificity (TN/TN+FP) is the percentage of correct prediction of false sites.

|           | <b>MM1-SVM</b> | <b>Loi-Rajapakse</b> | <b>GeneSplicer</b> | <b>NNSplice</b> |
|-----------|----------------|----------------------|--------------------|-----------------|
| <b>SN</b> | <b>1-SP</b>    | <b>1-SP</b>          | <b>1-SP</b>        | <b>1-SP</b>     |
| 65        | 0.20           | 0.7                  | 0.9                | 1.4             |
| 70        | 0.30           | 0.9                  | 1.1                | 1.7             |
| 75        | 0.33           | 1                    | 1.4                | 2.1             |
| 80        | 0.35           | 1.4                  | 2.2                | 2.7             |
| 85        | 0.40           | 2.3                  | 2.7                | 3.2             |
| 90        | 0.60           | 3                    | 3.3                | 4.6             |
| 95        | 0.90           | 4.3                  | 4.8                | 7.1             |

**Table 3:** Training time in seconds required for the SVM for NN269 and DGSplicer acceptor and donor splice site dataset.

| <b>Dataset</b> | <b>Splice site</b> | <b>Training time (s)</b> |
|----------------|--------------------|--------------------------|
| NN269          | Acceptor           | 327                      |
|                | Donor              | 109                      |
| DGSplicer      | Acceptor           | 28891                    |
|                | Donor              | 11921                    |
